# Supplementary material for: Mycobacterium tuberculosis YrbE3A Promotes Host Innate Immune Response by Targeting NF-κB/JNK Signaling
Source: MDPI journal article supplement (doi:10.3390/microorganisms8040584), 2020-04-17
Supplement: s1 [file s1]

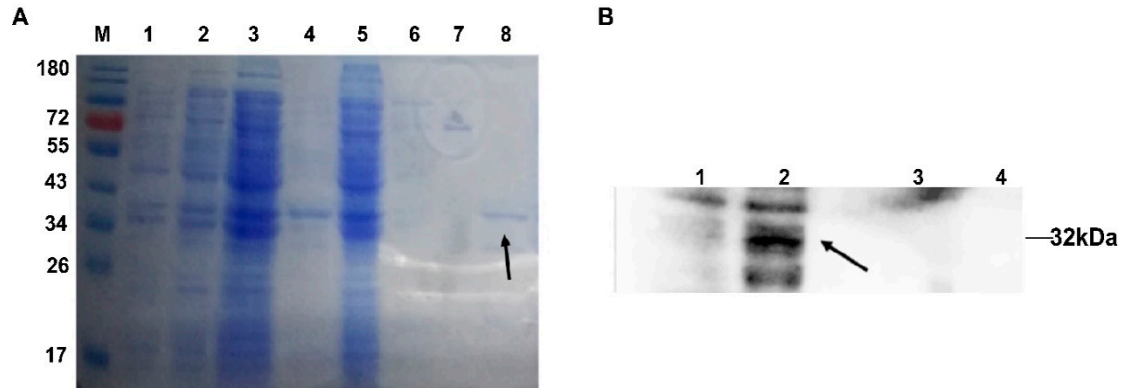

**Figure S1.** Identification of YrbE3A expression and cell location. **(A)** SDS-PAGE (12%) was used to determine the expression of the recombinant YrbE3A protein Lane M, PageRuler Prestained Protein Ladder; Lane 1, total Ms\_YrbE3A cell lysate without heat-inducible; Lane 2, total Ms\_YrbE3A cell lysate with heat-inducible; Lane 3, proteins in the supernatant; Lane 4, proteins in the pellet; Lane 5, binding buffer after washing; Lanes 6,7, washing buffer after washing; Lane 8, the purified YrbE3A protein. Arrow indicates the YrbE3A protein of 32 kDa. **(B)** Western blot assay on location of YrbE3A protein. The cellular proteins in cell lysate and bacterial membrane of Ms\_YrbE3A and Ms\_vec in SDS-PAGE were blotted to PVDF membrane. The blot was probed with His-tag monoclonal antibody. Lane 1, YrbE3A-cytoplasm; lane 2, YrbE3A-cytoplasm; Lane 3, Vec-cytoplasm; line 4, Vec-cytoplasm. Arrow indicates the YrbE3A protein.

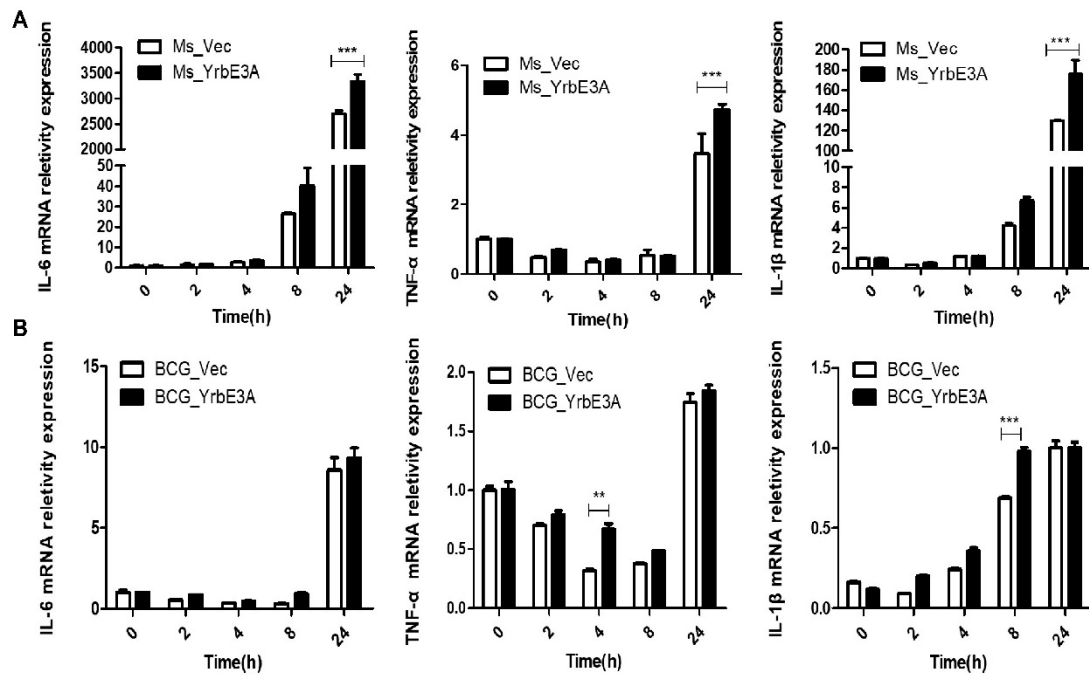

**Figure S2.** Transcription of cytokine expression of Ms\_YrbE3A, Ms\_Vec, BCG\_YrbE3A, and BCG\_Vec in infected RAW264.7 cells. **(A,B)** Quantitative RT-PCR was used to determine transcription levels of IL-6, TNF- $\alpha$ , and IL-1 $\beta$  by RAW264.7 infected by Ms\_YrbE3A and Ms\_Vec (A.). BCG\_YrbE3A and BCG\_Vec (B). Significant differences ( $*p < 0.05$ ,  $**p < 0.01$ ,  $***p < 0.001$ ) among each treatment were analyzed by a two-way ANOVA followed by the LSD test. Each sample was repeated in triplicate.

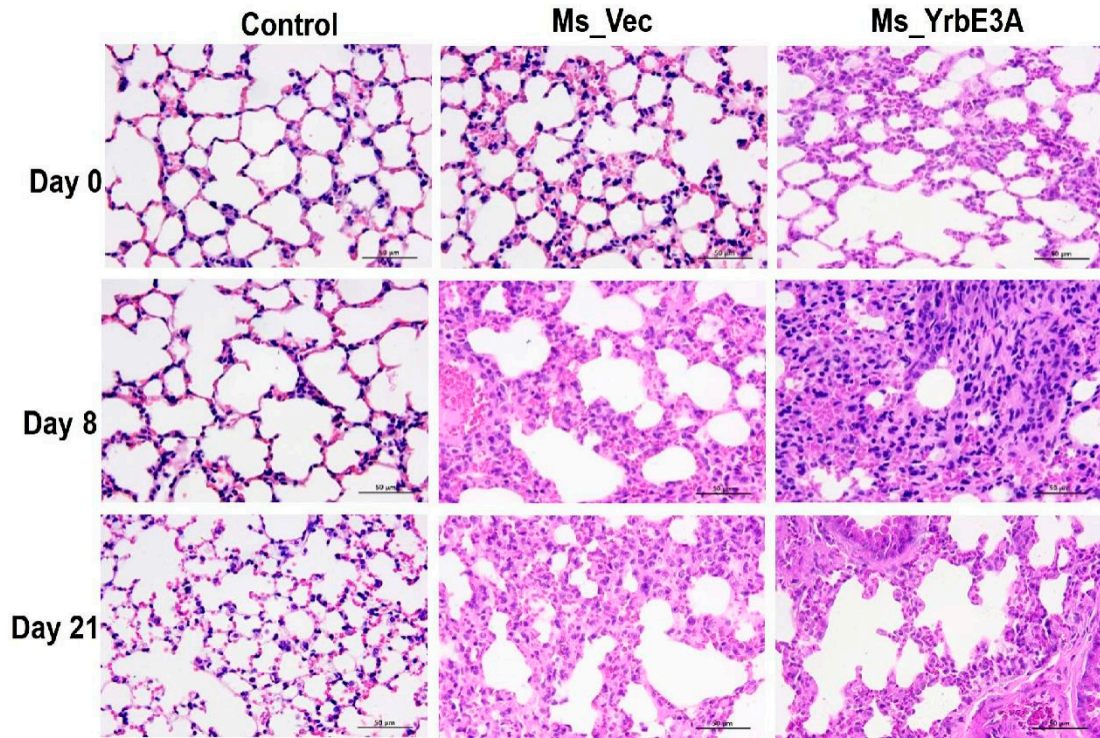

**Figure S3.** YrbE3A expression promoted lung inflammatory lesions in mice infected with recombinant Ms\_YrbE3A and Ms\_Vec. Mice were infected with Ms\_YrbE3A and Ms\_Vec at a dose of  $2.0 \times 10^6$  CFU via intratracheal challenge, euthanized at day 0, 8, and 21 postinfection, and lung tissues were observed after being sectioned and stained with Hematoxylin and eosin (H&E) stain. Scale bar: 50  $\mu$ m. Data are representative of one experiment with two independent biological replicates (mean  $\pm$  SEM of  $n = 5$  mice per group).

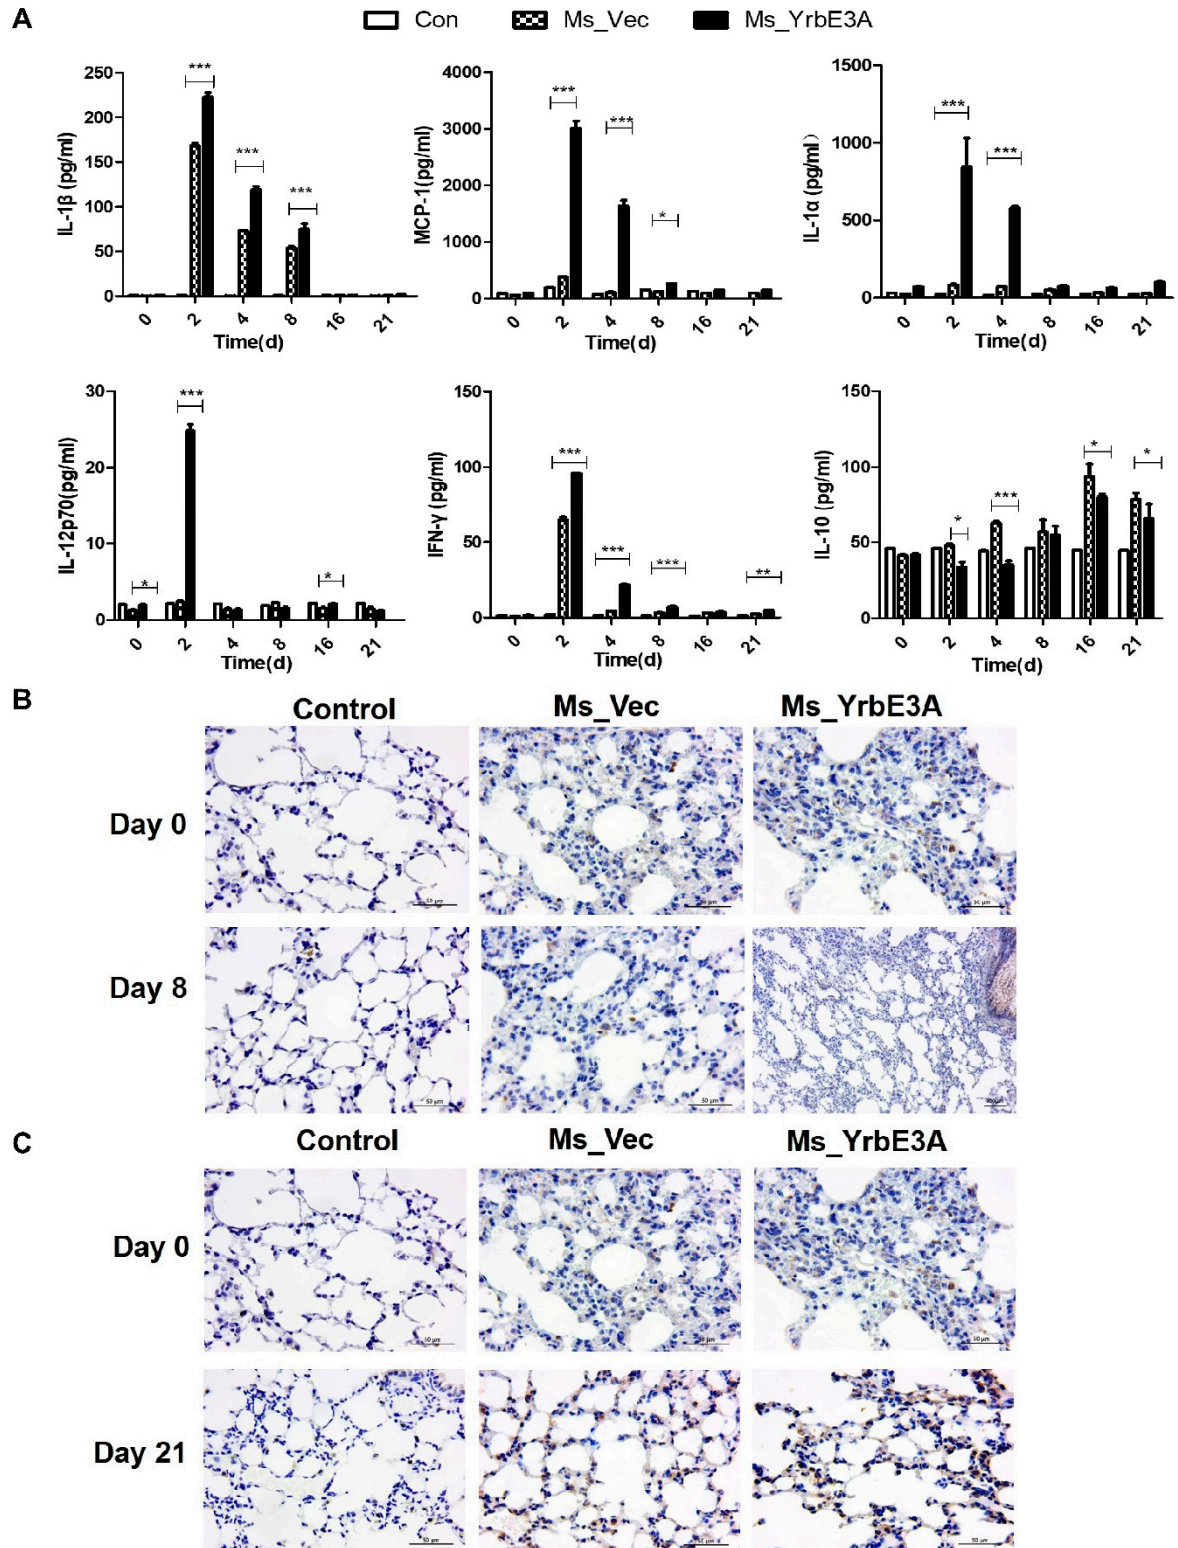

**Figure S4.** Detection of lung inflammatory cytokines in Ms\_YrbE3A- and Ms\_Vec-infected C57BL/6 mice. (A) Multiplex immunoassay of IL-1 $\beta$ , MCP-1, IL-1 $\alpha$ , IL-12p70, IFN- $\gamma$ , and IL-10 in lung cells from C57BL/6 mice infected intratracheally for 0–21 d with  $2.0 \times 10^6$  CFU of MS\_Vec and MS\_YrbE3A strains, while a saline control was used as the placebo. (B,C) The detection of the cytokines IL-6 (left panel) and TNF- $\alpha$  (right panel) in the lungs of experimental mice by immunohistochemistry at labelled days postinfection. Significant difference (\* $p < 0.05$ , \*\* $p < 0.01$ , \*\*\* $p < 0.001$ ) among treatments was analyzed by a two-way ANOVA followed by the LSD test. Each sample was repeated in triplicate.
